# Supplementary material
Source: publisher figshare collection journal article supplement (https://tandf.figshare.com/ndownloader/files/14808191)
Supplement: Supplementary file 1 [file 14808191]

**APPENDIX**

**Table 1**. Bivariate Associations Between Drug Category and Signs and Symptoms Among DEC Evaluations.

| **Signs and Symptoms** | ***N*** | **Cramer's V** | ***Χ2*** |
| --- | --- | --- | --- |
| Sick or injured (yes, no) | 1,458 | .23 | 79.51*** |
| Diabetic or epileptic (yes, no) | 1,452 | .11 | 16.05** |
| Disability or defects (yes, no) | 1,452 | .21 | 63.32*** |
| Care of doctor or dentist (yes, no) | 1,439 | .54 | 411.08*** |
| Taking of medication (yes, no) | 1,445 | .37 | 199.29*** |
| Condition of the eyes (normal, reddening of the conjunctiva, bloodshot, watery, combination of previous categories) | 1,494 | .25 | 351.32*** |
| Ability to follow stimulus (yes, no) | 1,494 | .11 | 17.27* |
| Eyelids (normal, droopy) | 1,480 | .43 | 270.74*** |
| Assessment of horizontal gaze nystagmus (not impaired, impaired) | 1,402 | .77 | 834.55*** |
| Vertical gaze nystagmus (yes, no) | 1,449 | .48 | 326.43*** |
| Convergence (present, absent) | 1,463 | .35 | 183.85*** |
| Rebound dilation (yes, no) | 1,444 | .50 | 365.75*** |
| Reaction to light (little to none, slow, normal) | 1,460 | .62 | 1,116.20*** |
| Visible injections (none, old/fresh) | 1,490 | .30 | 137.82*** |
| Muscle tone (near normal, flaccid, rigid) | 1,481 | .47 | 652.01*** |
| Average pulse rate (low, normal, high) | 1,450 | .30 | 252.43*** |
| Body temperature (low, normal, high) | 1,453 | .21 | 127.74*** |
| Systolic blood pressure (low, normal, high) | 1,482 | .27 | 221.89*** |
| Diastolic blood pressure (low, normal, high) | 1,482 | .20 | 114.83*** |
| Pupil size in room light (constricted, normal, dilated) | 1,490 | .42 | 515.67*** |
| Pupil size in darkness (constricted, normal, dilated) | 1,454 | .54 | 860.85*** |
| Pupil size in direct light (constricted, normal, dilated) | 1,464 | .33 | 316.49*** |
| Performance on One Leg Stand Test (not impaired, impaired) | 1,507 | .43 | 275.81*** |
| Performance on Walk and Turn Test (not impaired, impaired) | 1,507 | .45 | 308.57*** |
| Presence of eyelid tremors (yes, no) | 1,391 | .46 | 298.05*** |
| Presence of leg tremors (yes, no) | 1,362 | .26 | 93.06*** |
| Presence of body tremors (yes, no) | 1,233 | .20 | 48.12*** |
| Number of hits on Finger to Nose Test | 1,419 | .08†** | — |
| Completion of Modified Romberg Balance Test (not completed, completed) | 1,509 | .14 | 29.81*** |
| Total sway on Modified Romberg Balance Test (<2 inches, 2+ inches) | 1,428 | .32 | 148.52*** |
| Estimate of 30 seconds on Modified Romberg Balance Test (accurate, slow, fast) | 1,468 | .16 | 72.34*** |

*Note*. The categorization of signs and symptoms was based on DEC standards.

†This is a point-biserial correlation, which is a correlation between a dichotomous and a quantitative variable.

**p* < .05. ***p* < .01. ****p* < .0001.

**Table 2.** Contribution of Signs and Symptoms in Predicting Drug Category among DEC Evaluations.

| **Signs and Symptoms** | ***χ2* to Remove** | ***df*** |
| --- | --- | --- |
| Under care of doctor or dentist | 47.47* | 4 |
| Condition of the eyes | 82.63* | 16 |
| Eyelids | 28.33* | 4 |
| Mean pulse rate | 41.34* | 8 |
| Assessment of horizontal gaze nystagmus | 189.71* | 4 |
| Convergence | 50.50* | 4 |
| Performance on the One Leg Stand Test | 30.17* | 4 |
| Eyelid tremors | 26.34* | 4 |
| Pupil size in darkness | 35.44* | 8 |
| Reaction to light | 84.75* | 8 |
| Presence of visible injection sites | 21.56* | 4 |
| Systolic blood pressure | 25.14* | 8 |
| Muscle tone | 36.75* | 8 |

**p* < .0022.
